# Supplementary material for: Wildlife-transmitted Taenia and Versteria cysticercosis and coenurosis in humans and other primates
Source: PubMed Central journal article supplement — Int J Parasitol Parasites Wildl. 2019 Apr 11;9:342–58. doi: 10.1016/j.ijppaw.2019.03.013 (PMC6626850; doi:10.1016/j.ijppaw.2019.03.013), 2019-04-11
Supplement: mmc1.pdf [file mmc1.pdf]

**Wildlife-transmitted *Taenia* and *Versteria* cysticercosis and coenurosis in humans and other primates**

Peter Deplazes, Ramon M. Eichenberger, Felix Grimm

**Supplemental table 1.** Case-reports of coenurosis in humans.

| Year                           | Patient                 | Clinical signs                                                             | Infection site                     | Treatment / Outcome                  | Reference                                          |
|--------------------------------|-------------------------|----------------------------------------------------------------------------|------------------------------------|--------------------------------------|----------------------------------------------------|
| <b><i>Taenia multiceps</i></b> |                         |                                                                            |                                    |                                      |                                                    |
| 1913                           | 40 M, France            | Epilepsy                                                                   | Brain, lateral ventricles          | died                                 | Brumpt, 1913 (described by Correa et al., 1962)    |
| 1936                           | unknown, Africa         | unknown                                                                    | Brain                              | unknown                              | Spencer, 1936 (described by Correa et al., 1962)   |
| 1940                           | unknown, South Africa   | unknown                                                                    | Brain, left lateral ventricle      | unknown                              | Cluver, 1940 (described by Craig and Faust, 1943)  |
| 1941                           | 39 M, England, Navy man | coma                                                                       | Brain, lateral ventricle           | died in hospital                     | Clapham, 1941                                      |
| 1941                           | unknown, England        | unknown                                                                    | Brain                              | unknown                              | Parkinson, 1942 (described by Correa et al., 1962) |
| 1942                           | 42 F, France            | unknown                                                                    | Brain, posterior cerebral fossa    | died                                 | Roger, 1942 (described by Correa et al., 1962)     |
| 1946                           | 14 F, England           | paraplegia                                                                 | Spinal cord                        | surgery / non-recovery of paraplegia | Buckley, 1947; Crusz, 1948; Landells, 1949         |
| 1948                           | 2 M, USA                | hemiparesis, hydrocephalus                                                 | Brain, pons, medulla               | died                                 | Johnstone and Jones, 1950                          |
| 1948                           | 24 M, Spain             | seizures, loss of consciousness (since 4,5 years)                          | Brain                              | Surgery / unknown                    | Gallego, 1957                                      |
| 1950                           | 55 M, South Africa      | confused, distractible, headache, vomitus, momentary loss of consciousness | Brain, lateral and third ventricle | surgery / recovered partially        | Becker and Jacobson, 1951a                         |
| 1950                           | 34 M, South Africa      | headache, bilateral tinnitus, neck stiffness                               | Brain, left ventricle              | surgery / symptoms remained          | Becker and Jacobson, 1951a                         |
| 1950                           | 33 M, South Africa      | headache, vomitus, left side paralysis                                     | Brain, cerebellum and spinal cord  | surgery / some symptoms remained     | Becker and Jacobson, 1951a                         |
| 1950                           | 28 M, South Africa      | unknown                                                                    | Brain, fourth ventricle            | unknown                              | Becker and Jacobson, 1951a                         |
| 1953                           | 42 M, France            | Apathy, disorientation, incontinence                                       | Brain                              | died in hospital                     | Ranque and Nicoli, 1955                            |
| 1954                           | 21 M, Uganda            | painful left eye, blindness, headache                                      | Intraocular                        | Eye removed / unknown                | Boase, 1956                                        |

|      |                           |                                                                                           |                                                             |                              |                                                                                |
|------|---------------------------|-------------------------------------------------------------------------------------------|-------------------------------------------------------------|------------------------------|--------------------------------------------------------------------------------|
| 1955 | 32 M, South Africa        | Headache and neck stiffness                                                               | Brain, cerebellum                                           | died                         | Watson and Laurie, 1955                                                        |
| 1955 | 33 M, South Africa        | Coma in hospital                                                                          | Brain, left and right occipital lobe, right temporal lobe   | died                         | Watson and Laurie, 1955                                                        |
| 1955 | 51 M, African             | Conjunctivitis, Iritis, severe pain                                                       | Intraocular                                                 | Eye removed / unknown        | Wainwright, 1957                                                               |
| 1956 | unknown, France           | unknown                                                                                   | Brain                                                       | unknown                      | Bertrand, 1956 (described by Correa et al., 1962)                              |
| 1956 | 12 M, Uganda              | unknown                                                                                   | Intraocular                                                 | unknown                      | Raper & Dockeray, 1956 (described by Correa et al., 1962; Wilson et al., 1972) |
| 1956 | F, Uganda                 | unknown                                                                                   | Intraocular                                                 | unknown                      | Raper & Dockeray, 1956 (described by Correa et al., 1962; Wilson et al., 1972) |
| 1956 | 1 F, Ruanda               | unknown                                                                                   | Intraocular                                                 | Eye removed / unknown        | Boase, 1956                                                                    |
| 1957 | 24 M, African             | Impaired vision, occipital headache, vomitus                                              | Brain, 3rd ventricle                                        | Sudden death                 | Wainwright, 1957                                                               |
| 1957 | 42 M, European            | Frontal headache, progressive paresis, staggering, spastic right arm, neck stiffness      | Brain, subarachnoidal and temporal                          | Sudden death                 | Wainwright, 1957                                                               |
| 1957 | 32 F, African             | Severe headache, paresis, ataxia, neck rigidity                                           | Brain, cerebellum and subarachnoidal                        | Death                        | Wainwright, 1957                                                               |
| 1957 | 27 F, African             | Headache, dysphagia, cloudy vision, ataxia                                                | Brain, cerebellum, subarachnoidal, and behind optic chiasma | Death                        | Wainwright, 1957                                                               |
| 1957 | 48 M, Spain               | chiasmatic syndrome                                                                       | Brain                                                       | Surgery / unknown            | Gallego, 1957                                                                  |
| 1959 | 3 F, Swaziland (European) | Sore left eye                                                                             | Intraocular                                                 | Eye removed / loss of vision | Epstein et al., 1959                                                           |
| 1962 | 42 F, Brazil              | Generalized seizures, progressive paresis                                                 | Brain, arachnoidal                                          | died                         | Correa et al., 1962                                                            |
| 1964 | unknown, Italy            | unknown                                                                                   | Brain                                                       | unknown                      | D' Andrea, 1964 (described by Lescano and Zunt, 2013)                          |
| 1970 | 2 M, USA                  | fever, irritability, incoordination, progressive lassitude, anorexia, infrequent vomiting | Brain, spinal cord                                          | surgery / died               | Hermos et al., 1970                                                            |
| 1971 | 43 W, Ghana               | painful redness, right eye, headache                                                      | Intraocular                                                 | Surgery / loss of vision     | Manschot, 1976                                                                 |

|           |                   |                                                                             |                                                                    |                                                      |                                                    |
|-----------|-------------------|-----------------------------------------------------------------------------|--------------------------------------------------------------------|------------------------------------------------------|----------------------------------------------------|
| 1971      | 2 W, Ghana        | redness left eye                                                            | Intramuscular, inferior fornix                                     | Surgery / recovery                                   | Manschot, 1976                                     |
| 1976      | 37 F, Switzerland | Headache, paraesthesia, hallucinations, left hemiparesis                    | Brain, anterior part of internal capsule and left nucleus caudatus | surgery / severe right hemiparesis and motor aphasia | Michal et al., 1977                                |
| 1982      | 3 F, USA          | Delayed development, weakness, vomitus, hydrocephalus                       | Brainstem, fourth ventricle, spinal cord                           | Surgery + PZQ / died                                 | Ing et al., 1998; Schellhas and Norris, 1985       |
| 1987      | 54 M, Italy       | Generalized seizures, progressive weakness, hemiparesis                     | Brain, parenchyma and interpeduncular cistern                      | survived                                             | Pau et al., 1987                                   |
| 1970-1990 | 28 M, Italy       | Drowsiness, bilateral papilledema, right hemiparesis                        | Brain                                                              | surgery / able to work                               | Pau et al., 1990                                   |
| 1970-1990 | 51 F, Italy       | Seizures, blindness                                                         | Brain                                                              | surgery / non-recovery, died after 10 years          | Pau et al., 1990                                   |
| 1970-1990 | 32 M, Italy       | Headache, drowsiness                                                        | Brain                                                              | surgery / recovery                                   | Pau et al., 1990                                   |
| 1990      | unknown, Nigeria  | unknown                                                                     | Brain                                                              | unknown                                              | Malomo, 1990 (described by Lescano and Zunt, 2013) |
| 2000      | Egypt             | unknown                                                                     | unknown                                                            | unknown                                              | Antonios and Mina, 2000                            |
| 2004      | 46 F, Italy       | left facial palsy, left-sided paraesthesia, ataxia                          | Brain, pons                                                        | Surgery / incontinence, paresis                      | Sabattani et al., 2004                             |
| 2007      | 4 F, Israel       | recurrent headache, nausea, paresis in arms and legs, bilateral papilledema | Brain, left hemisphere                                             | Surgery + PZQ / recovery                             | Benifla et al., 2007; El-On et al., 2008           |
| 2010      | 55 M, India       | Headache, left-sided hemiparesis, sensory impairment                        | Brain, left parietal lobe                                          | Surgery + Albendazole / recovery                     | Ambekar et al., 2013; Mahadevan et al., 2011       |
| 2010      | 36 M, India       | Headache, vomiting                                                          | Brain                                                              | Surgery + Albendazole / recovery                     | Mahadevan et al., 2011                             |

---

***Taenia serialis***

|      |              |                                |                                                                            |                      |                       |
|------|--------------|--------------------------------|----------------------------------------------------------------------------|----------------------|-----------------------|
| 1932 | 50 F, France | incidental post-mortem finding | Three subcutaneous mass, subscapular right, left femur, right juxta iliaca | death of other cause | Brumpton et al., 1934 |
|------|--------------|--------------------------------|----------------------------------------------------------------------------|----------------------|-----------------------|

---

|      |                                         |                                                                                             |                                           |                          |                                                                                |
|------|-----------------------------------------|---------------------------------------------------------------------------------------------|-------------------------------------------|--------------------------|--------------------------------------------------------------------------------|
| 1933 | 59 F, France                            | palpable swelling                                                                           | Subcutaneous, right buttock               | unknown                  | Bonnal et al., 1933 (described by Correa et al., 1962; Nagaty and Ezzat, 1946) |
| 1942 | 30 M, Nigeria                           | Stiffness and discomfort in right arm                                                       | Intramuscular                             | Surgery / no follow up   | Cannon, 1942                                                                   |
| 1949 | unknown M, France                       | routine medical examination                                                                 | Intramuscular, left deltoid               | Surgery / unknown        | Harant & Midrouillet, 1949 (described by Correa et al., 1962)                  |
| 1956 | F, Kenya                                | unknown                                                                                     | Subcutaneous                              | unknown                  | Raper & Dockeray, 1956 (described by Correa et al., 1962; Wilson et al., 1972) |
| 1956 | F, Uganda                               | unknown                                                                                     | Subcutaneous                              | unknown                  | Raper & Dockeray, 1956 (described by Correa et al., 1962; Wilson et al., 1972) |
| 1956 | F, Uganda                               | unknown                                                                                     | Subcutaneous                              | unknown                  | Raper & Dockeray, 1956 (described by Correa et al., 1962; Wilson et al., 1972) |
| 1967 | 62 F, USA                               | Soft tissue tumour right neck, painless                                                     | Intramuscular, trapezius muscle           | Surgery / benign         | Raper & Dockeray, 1956 (described by Correa et al., 1962; Wilson et al., 1972) |
| 1979 | 38 F, Canda                             | rash, pyrexia, night sweats, lymphadenopathy                                                | Intramuscular, axillary fold, left breast | Surgery / unknown        | Benger et al., 1981                                                            |
| 1994 | 39 M, USA                               | Fever, chest & back pain, dyspnoea, nausea, vomitus, mass on back (progressively enlarging) | Intramuscular, left upper back            | Surgery + PZQ / recovery | Ing et al., 1998                                                               |
| 2005 | 24 F, Ivory Coast (diagnosed in France) | subcutaneous mass                                                                           | Intramuscular, right scapula              | unknown                  | Collomb et al., 2007                                                           |

---

***Taenia brauni***

|           |                   |                   |                |         |                                                                                              |
|-----------|-------------------|-------------------|----------------|---------|----------------------------------------------------------------------------------------------|
| 1931      | adult F, DR Congo | unknown           | Subcutaneous   | unknown | Taramelli + Dubois, 1931 (described by Correa et al., 1962; Fain, 1956; Wilson et al., 1972) |
| 1948-1957 | child F, Congo    | subcutaneous mass | Along the ribs | unknown | Fain, 1956                                                                                   |
| 1948-1957 | child F, Congo    | subcutaneous mass | Along the ribs | unknown | Fain, 1956                                                                                   |
| 1948-1957 | child F, Congo    | subcutaneous mass | Along the ribs | unknown | Fain, 1956                                                                                   |

---

|           |                 |                                    |                              |         |                                                                    |
|-----------|-----------------|------------------------------------|------------------------------|---------|--------------------------------------------------------------------|
| 1948-1957 | child M, Congo  | subcutaneous mass                  | Along the ribs               | unknown | Fain, 1956                                                         |
| 1948-1957 | child M, Congo  | subcutaneous mass                  | Trunk                        | unknown | Fain, 1956                                                         |
| 1948-1957 | child M, Congo  | subcutaneous mass                  | Trunk                        | unknown | Fain, 1956                                                         |
| 1948-1957 | child M, Congo  | subcutaneous mass                  | Trunk                        | unknown | Fain, 1956                                                         |
| 1948-1957 | 14 M, DR Congo  | subcutaneous mass                  | Trunk                        | unknown | Fain, 1956                                                         |
| 1964      | 6 F, Rwanda     | unknown                            | Subconjunctival              | unknown | Vanderick et al., 1964 (described by Williams and Templeton, 1971) |
| 1964      | unknwon, Rwanda | unknown                            | Orbital                      | unknown | Vanderick et al., 1964 (described by Williams and Templeton, 1971) |
| 1968      | 5, Uganda       | subcutaneous mass, mainly painless | Subcutaneous, lip            | unknown | Templeton, 1968                                                    |
| 1968      | 28 M, Uganda    | subcutaneous mass, mainly painless | Subcutaneous, shoulder       | unknown | Templeton, 1968                                                    |
| 1968      | 9 M, Uganda     | subcutaneous mass, mainly painless | Subcutaneous, intercostal    | unknown | Templeton, 1968                                                    |
| 1968      | 7 F, Uganda     | subcutaneous mass, mainly painless | Subcutaneous, temple         | unknown | Templeton, 1968                                                    |
| 1968      | 25 M, Uganda    | subcutaneous mass, mainly painless | Subcutaneous, intercostal    | unknown | Templeton, 1968                                                    |
| 1968      | 3 F, Uganda     | subcutaneous mass, mainly painless | Subcutaneous, abdominal wall | unknown | Templeton, 1968                                                    |
| 1968      | 3 F, Uganda     | subcutaneous mass, mainly painless | Subcutaneous, intercostal    | unknown | Templeton, 1968                                                    |
| 1968      | 30 M, Uganda    | subcutaneous mass, mainly painless | Subcutaneous, intercostal    | unknown | Templeton, 1968                                                    |
| 1968      | 6 F, Uganda     | subcutaneous mass, mainly painless | Subcutaneous, axilla         | unknown | Templeton, 1968                                                    |
| 1968      | 4 M, Uganda     | subcutaneous mass, mainly painless | Subcutaneous, abdominal wall | unknown | Templeton, 1968                                                    |
| 1968      | 5 M, Uganda     | subcutaneous mass, mainly painless | Subcutaneous, intercostal    | unknown | Templeton, 1968                                                    |
| 1968      | 2 M, Uganda     | subcutaneous mass, mainly painless | Subcutaneous, eyelid         | unknown | Templeton, 1968                                                    |

|      |                     |                                              |                                  |                                       |                              |
|------|---------------------|----------------------------------------------|----------------------------------|---------------------------------------|------------------------------|
| 1968 | 4 F, Uganda         | subcutaneous mass, mainly painless           | Subcutaneous, abdominal wall     | unknown                               | Templeton, 1968              |
| 1968 | 45 F, Uganda        | unilateral blindness, painful eye            | Subcutaneous, periocular         | unknown                               | Templeton, 1968              |
| 1982 | 40 F, Nigeria (USA) | Axillary mass                                | Subcutaneous mass, left axillary | Surgery / recovery                    | Kurtycz et al., 1983         |
| 1987 | 25 M, Nigeria       | painful redness, blurry of vision, right eye | Intraocular                      | Local steroids + PZQ / loss of vision | Ibechukwu and Onwukeme, 1991 |

---

***Taenia glomeratus***

|      |                  |         |                                |         |                         |
|------|------------------|---------|--------------------------------|---------|-------------------------|
| 1919 | unknown, Nigeria | unknown | Subcutaneous mass, intercostal | unknown | Turner and Leiper, 1919 |
|------|------------------|---------|--------------------------------|---------|-------------------------|

---

***Unspecified coenurosis***

|      |                  |                                                           |                                 |                            |                                                |
|------|------------------|-----------------------------------------------------------|---------------------------------|----------------------------|------------------------------------------------|
| 1930 | 21 F, Spain      | "pyoderma" in the right leg, nodes in arm, neck and chest | Subcutaneous                    | Surgery / unknown          | Gallego, 1957                                  |
| 1966 | adult M, Nigeria | unknown                                                   | Intramuscular, neck             | unknown                    | Cowper 1966 (described by Wilson et al., 1972) |
| 1969 | 20 M, Ghana      | neck swelling                                             | Intramuscular, left neck        | unknown                    | Wilson et al., 1972                            |
| 1971 | 14 F, Uganda     | pain in the eye                                           | Orbital, anterior chamber       | surgery / partial recovery | Williams and Templeton, 1971                   |
| 1971 | 1 M, Uganda      | unknown                                                   | Orbital, subconjunctival        | unknown                    | Williams and Templeton, 1971                   |
| 1971 | 1 F, Uganda      | unknown                                                   | Orbital, subconjunctival        | unknown                    | Williams and Templeton, 1971                   |
| 1971 | adult M, Uganda  | unknown                                                   | Orbital, vitreous               | unknown                    | Williams and Templeton, 1971                   |
| 1971 | 35 M, Uganda     | unknown                                                   | Orbital, vitreous               | unknown                    | Williams and Templeton, 1971                   |
| 1978 | 48 M, USA        | Weakness of right hand, focal seizure                     | Brain, left frontoparietal area | surgery / total recovery   | Jung et al., 1981                              |

---

## References:

- Ambekar, S., Prasad, C., Dwarakanath, S., Mahadevan, A., 2013. MRS findings in cerebral coenurosis due to *Taenia multiceps*. J. Neuroimaging. 23, 149-151.
- Antonios, S.N., Mina, S.N., 2000. A case report of human *Coenurus cerebralis* in Tanta, Egypt. J. Egypt. Soc. Parasitol. 30, 959-960.
- Becker, B.J., Jacobson, S., 1951a. Infestation of the human brain with *Coenurus cerebralis*; a report of three cases. Lancet 2, 198-202.
- Benger, A., Rennie, R.P., Roberts, J.T., Thornley, J.H., Scholten, T., 1981. A human coenurus infection in Canada. Am. J. Trop. Med. Hyg. 30, 638-644.
- Benifla, M., Barrely, R., Shelef, I., El-On, J., Cohen, A., Cagnano, E., 2007. Huge hemispheric intraparenchymal cyst caused by *Taenia multiceps* in a child. Case report. J. Neurosurg. 107, 511-514.
- Boase, A.J., 1956. Coenurus cyst of the eye. Br. J. Ophthalmol. 40, 183-185.
- Brumpt, E., Duvoir, M.E., Sainton, J., 1934. Un cas de cénurose humaine dû au *Cœnurus serialis*. Parasite habituel des lapins et des lièvres. Ann. Parasitol. Hum. Comp. 12, 371-383.
- Buckley, J.J.C., 1947. Coenurus from human spinal cord. Trans. Roy. Soc. Trop. Med. & Hyg. 41, 7.
- Cannon, D.A., 1942. A Case of Human Infection with a Species of Coenurus. Ann. Trop. Med. Parasit. 36, 32-34.
- Clapham, P.A., 1941. An English Case of *Coenurus cerebralis* in the Human Brain. J. Helminthol. 19, 84-86 pp.
- Collomb, J., Machouart, M., Biava, M.F., Brizion, M., Montagne, K., Plenat, F., Fortier, B., 2007. Contribution of NADH dehydrogenase subunit I and cytochrome C oxidase subunit I sequences toward identifying a case of human coenuriasis in France. J. Parasitol. 93, 934-937.
- Correa, F.M., Ferrioli Filho, F., Forjaz, S., Martelli, N., 1962. [Cerebral coenurosis. Apropos of a human case]. Rev. Inst. Med. Trop. Sao Paulo 4, 38-45.
- Craig, C.F., Faust, E.C., 1943. Clinical Parasitology. Lea & Febiger, Philadelphia, PA, USA.
- Crusz, H., 1948. On an English case of an intramedullary spinal coenurus in man, with some remarks on the identity of *Coenurus* spp. infesting man. J. Helminthol. 22, 73-76.
- El-On, J., Shelef, I., Cagnano, E., Benifla, M., 2008. *Taenia multiceps*: a rare human cestode infection in Israel. Vet. Ital. 44, 621-631.
- Epstein, E., Proctor, N.S., Heinz, H.J., 1959. Intra-ocular coenurus infestation. S. Afr. Med. J. 33, 602-604.
- Fain, A., 1956. Coenurus of *Taenia brauni* Setti parasitic in man and animals from the Belgian Congo and Ruanda-Urundi. Nature 178, 1353.
- Gallego, C.R., 1957. Primeros casos de cenurosis humana en Espana. Rev. Iber. Parasit. 17.
- Hermos, J.A., Healy, G.R., Schultz, M.G., Barlow, J., Church, W.G., 1970. Fatal human cerebral coenurosis. J.A.M.A. 213, 1461-1464.
- Ibechukwu, B.I., Onwukeme, K.E., 1991. Intraocular coenurosis: a case report. Br. J. Ophthalmol. 75, 430-431.
- Ing, M.B., Schantz, P.M., Turner, J.A., 1998. Human coenurosis in North America: case reports and review. Clin. Infect. Dis. 27, 519-523.
- Johnstone, H.G., Jones, O.W., Jr., 1950. Cerebral coenurosis in an infant. Am. J. Trop. Med. Hyg. 30, 431-441.
- Jung, R.C., Rodriguez, M.A., Beaver, P.C., Schenthal, J.E., Levy, R.W., 1981. Racemose cysticercus in human brain. A case report. Am. J. Trop. Med. Hyg. 30, 620-624.
- Kurtycz, D.F., Alt, B., Mack, E., 1983. Incidental coenurosis: larval cestode presenting as an axillary mass. Am. J. Clin. Pathol. 80, 735-738.
- Landells, J.W., 1949. Intra-medullary Cyst of the Spinal Cord Due to the Cestode *Multiceps multiceps* in the Coenurus Stage: Report of a Case. J. Clin. Pathol. 2, 61-63.
- Lescano, A.G., Zunt, J., 2013. Other cestodes: sparganosis, coenurosis and *Taenia crassiceps* cysticercosis. Handb. Clin. Neurol. 114, 335-345.
- Mahadevan, A., Dwarakanath, S., Pai, S., Kovoov, J.M., Radhesh, S., Srinivas, H.V., Chandramouli, B.A., Shankar, S.K., 2011. Cerebral coenurosis mimicking hydatid disease - report of two cases from South India. Clin. Neuropathol. 30, 28-32.
- Manschot, W.A., 1976. Coenurus infestation of eye and orbit. Arch. Ophthalmol. 94, 961-964.
- Michal, A., Regli, F., Campiche, R., Cavallo, R.J., de Crousaz, G., Oberson, R., Rabinowicz, T., 1977. Cerebral coenurosis. Report of a case with arteritis. J. Neurol. 216, 265-272.

- Nagaty, H.F., Ezzat, M.A., 1946. On the identity of *Multiceps multiceps* (Leske, 1780), *M. gaigeri* Hall, 1916, and *M. serialis* (Gervais, 1845), with a review of these and similar forms in man and animals. Proc. Helminthol. Soc. Wash. 13, 33-44.
- Pau, A., Perria, C., Turtas, S., Brambilla, M., Viale, G., 1990. Long-term follow-up of the surgical treatment of intracranial coenurosis. Br. J. Neurosurg. 4, 39-43.
- Pau, A., Turtas, S., Brambilla, M., Leoni, A., Rosa, M., Viale, G.L., 1987. Computed tomography and magnetic resonance imaging of cerebral coenurosis. Surg. Neurol. 27, 548-552.
- Ranque, J., Nicoli, R.N., 1955. [Parasitological aspects of cerebral coenurosis; a new case]. Ann. Parasitol. Hum. Comp. 30, 22-42.
- Sabattani, S., Marliani, A.F., Roncaroli, F., Zucchelli, M., Zini, A., Calbucci, F., Chiodo, F., 2004. Cerebral coenurosis. Case illustration. J. Neurosurg. 100, 964.
- Schellhas, K.P., Norris, G.A., 1985. Disseminated human subarachnoid coenurosis: computed tomographic appearance. Am. J. Neuroradiol. 6, 638-640.
- Templeton, A.C., 1968. Human coenurus infection. A report of 14 cases from Uganada. Trans. R. Soc. Trop. Med. Hyg. 62, 251-255.
- Turner, M., Leiper, R.T., 1919. On the occurrence of *Coenurus glomeratus* in man in West Africa. T. Roy. Soc. Trop. Med. H. 13, 23-24.
- Wainwright, J., 1957. *Cœnurus cerebralis* and racemose cysts of the brain. J. Path. Bact. 73, 347-354.
- Watson, K.C., Laurie, W., 1955. Cerebral coenuriasis in man. Lancet 269, 1321-1322.
- Williams, P.H., Templeton, A.C., 1971. Infection of the eye by tapeworm *Coenurus*. Br. J. Ophthalmol. 55, 766-769.
- Wilson, V.C., Wayte, D.M., Addae, R.O., 1972. Human coenurosis - the first reported case from Ghana. Trans. R. Soc. Trop. Med. Hyg. 66, 611-623.
